# Supplementary material for: The Estimation of the Long-Term Agricultural Output with a Robust Machine Learning Prediction Model
Source: MDPI journal article supplement (doi:10.3390/agriculture12081075), 2022-07-22
Supplement: s1 [file s1]

Supplementary Table S1. The actual and predicted data of models

| Year | Actual data | LM       | GAIGM(1, 1) | ANN      | LSTM      | MBO/SVR  |
|------|-------------|----------|-------------|----------|-----------|----------|
| 2009 | 391.7       | 352.3455 | 383.6912    | 373.4163 | 353.7660  | 388.9988 |
| 2010 | 404.4       | 371.6949 | 385.8983    | 367.5598 | 369.7403  | 396.1574 |
| 2011 | 445.6       | 375.1222 | 388.1182    | 373.4148 | 372.7699  | 397.1728 |
| 2012 | 471.9       | 386.2407 | 390.3508    | 373.4163 | 382.7462  | 456.3044 |
| 2013 | 475.9       | 393.3382 | 392.5962    | 373.4163 | 389.0938  | 488.8262 |
| 2014 | 518.9       | 394.4176 | 394.8546    | 373.4163 | 390.0498  | 482.0672 |
| 2015 | 518.7       | 406.0219 | 397.1259    | 373.4163 | 400.0565  | 539.875  |
| 2016 | 527.5       | 405.9679 | 399.4103    | 373.4163 | 400.0114  | 528.0111 |
| 2017 | 528.0       | 408.3427 | 401.7079    | 373.4163 | 401.98236 | 527.6187 |
| 2018 | 549.8       | 408.4776 | 404.0187    | 373.4163 | 402.0934  | 537.4207 |
| 2019 | 508.4       | 414.3607 | 406.3427    | 373.4163 | 406.8326  | 544.3911 |
| 2020 | 519.9       | 403.1883 | 408.6802    | 373.4163 | 397.6672  | 494.1790 |
